# Supplementary material
Source: HighWire-hosted journal article supplement (https://diabetes.diabetesjournals.org/content/suppl/2005/03/25/54.4.1214)
Supplement: pg1214LehmanAppendix.pdf [file pg1214LehmanAppendix.pdf]

| primer name | sequence                       |
|-------------|--------------------------------|
| mgea5_1a5   | ACAAGTTGGGCTACGGCTAA           |
| mgea5_1a3   | CTGACTGAGCAGAAGGGGAG           |
| mgea5_2a5   | CAAACCCATCTAGGGCTCAG           |
| mgea5_2a3   | GCCTTGAATCATTTTCCCCT           |
| mgea5_4a5   | GTTCTAGAGCCCAGCACGAG           |
| mgea5_4a3   | ACGCGAAAAGCAGAAGGTAA           |
| mgea5_5a5   | CTCTCCTTTTCACCTTCCCC           |
| mgea5_5a3   | GAGGCTGTGACCTCTCGTTC           |
| mgea5_7d5   | AGAGGCAGAGAACGAGGACAG          |
| mgea5_7a3   | CTCCAACGTTCGCTTGACTC           |
| mgea5_8a5   | ACTTGGAGCTGAAGCCCTCT           |
| mgea5_8a3   | TTAGGAGGGCCACATTTTCAG          |
| mgea5_10a5  | TTGTAACGTCACCACCCAAA           |
| mgea5_10a3  | AATGCACCTGGGCTATTCAC           |
| mgea5_11a5  | TCCAAGAAGAGGGAAATGGA           |
| mgea5_11a3  | TAGCGCAGAGCACTCTTTCA           |
| mgea5_12a5  | TGGCCTGTTGTTAAGTTGGA           |
| mgea5_12a3  | GAGATTGTGCCACTGCACTC           |
| mgea5_13a5  | TGAGAAATGGGTCCCAAAAC           |
| mgea5_13a3  | TACACACCAAAGGAGGAGGG           |
| mgea5_14d3  | GTATTCAATTAACAAGAACAAGCAATTTTC |
| mgea5_14c5  | TCCACATTCAAAAACCCATGG          |
| mgea5_15a5  | CAAATGATCTGCCCACCTCT           |
| mgea5_15a3  | CCACTGGCTCTAGTTAACCCC          |
| mgea5_16a5  | TGGTGAAGGGTCTTGCTTTT           |
| mgea5_16b3  | GGAGACAGTGTCTTTACTTTGTG        |
| mgea5_17a5  | CTTCCATTCCCTGCATCCCTA          |
| mgea5_17a3  | TTGGTTTCAATTCCTCTGCC           |
| mgea5_18a5  | AGCCTTGAGTGGTGAGCCTA           |
| mgea5_18a3  | TAACTGCAAATCCTCCAGGG           |
| mgea5_19a5  | GCTGAATCAAAATCCCCAGA           |
| mgea5_19a3  | AGGCATGAGCCATCATAACC           |
| mgea5_21a5  | TGTCAGTTTGGGGAGACACA           |
| mgea5_21a3  | GGAAATGTGCCAATTCCTTA           |
| mgea5_23a5  | GGTTAGGTAGGTGCACCAGG           |
| mgea5_23a3  | GCCTTACACTAAAGCTCGCA           |
| mgea5_24a5  | TCTGCTGCTTGCTGTGTCTT           |
| mgea5_24a3  | CTGCCTGCTGTGTGCTGTAT           |
| mgea5_26a5  | CAGCATGGCCAAGTTTCTCT           |
| mgea5_26a3  | CTCAAGTGATCCACCCACCT           |
| mgea5_27a5  | GATGGGTTTCATGGTCTTGG           |
| mgea5_27a3  | TTCAAGCAATTCTCCTGCCT           |
| mgea5_29b5  | ACAAAAATTAGCCAGGCGTG           |
| mgea5_29b3  | ATGTTGTTCATCCAGCAACCA          |
| mgea5_30a5  | ACAAAAATTAGCTGGGCGTG           |
| mgea5_30a3  | CCACCATAAATGCTCAGTGC           |
| mgea5_32a5  | CTTCCAGGTTTCTGCTCAGG           |
| mgea5_32a3  | TGTCCAATCTTTTGGCTTCC           |

|             |                         |
|-------------|-------------------------|
| mgea5_33a5  | GCACTGAGCATTTATGGTGG    |
| mgea5_33a3  | GCTGAGGATTCTCCCATCTG    |
| mgea5_35a5  | TTCCCTCCTCTCTCCAGTCCA   |
| mgea5_35a3  | AGAACCTGTCCCATTCCGTA    |
| mgea5_36a5  | CTCAAAGTAGGGGGTAGGGG    |
| mgea5_36a3  | GTTTGGAGGCCAAATCAAAA    |
| mgea5_37a5  | TTACGGAATGGGACAGGTTC    |
| mgea5_37a3  | ATCTGGTTCCTCTGACCAGC    |
| mgea5_38a5  | TGATTTGGCCTCCAAACATT    |
| mgea5_38a3  | ATCACAGCCCATGAAGGAAT    |
| mgea5_40a5  | AGATTAATCCTTCTCCCCCG    |
| mgea5_40a3  | AAGCGGAGAACGTTACGAGA    |
| mgea5_41a5  | TGAATTCCTTCATGGGCTGT    |
| mgea5_41a3  | TGGAACTCTCCTGCTAGACCA   |
| mgea5_42a5  | TCTCGTAACGTTCTCCGCTT    |
| mgea5_42a3  | TTAAAATGCTGTGCGACCTG    |
| mgea5_43a5  | CATCAGATGGCTGGAAGGAT    |
| mgea5_43a3  | TCCATGAACAAATTCAGCA     |
| mgea5_45a5  | CAGTGAAGCTCCATGAACA     |
| mgea5_45a3  | GGAGGGGAGTGCTTCTGAAT    |
| mgea5_46a5  | CCAAACCTCTCCTCCTGACA    |
| mgea5_46a3  | TAGGAGTCAGTGGAGGTGGC    |
| mgea5_47a5  | CTCCCCCAGCAAAGAGGTAT    |
| mgea5_47a3  | TTTCATCTGACTTTCTCAAGGGA |
| mgea5_48a5  | ACTCCCTCCCCAGACTGACT    |
| mgea5_48a3  | CAGAAGGAAAGAGGCCACAG    |
| mgea5_49a5  | GCAAGTACAGTGGGTCTTGGA   |
| mgea5_49a3  | TTGGGGAAAACAGTGAAAAATG  |
| mgea5_50a5  | CCTGGCCAACAGAAGGAGAT    |
| mgea5_50a3  | TCATAAAAAGGTGGGAAAAGCA  |
| mgea5_51c5  | GCTGGTGTAGACAGACAAGCC   |
| mgea5_51c3  | TCAAAAAGGAAGCCCACATC    |
| mgea5_52a5  | ATACTTGGTTCGGAGCCTGTG   |
| mgea5_p52a3 | TCTGCCATGTCCCCTAAGAC    |
| mgea5_53a5  | AAATCAGCCAATTGGATTCG    |
| mgea5_53a3  | ACAACATGCCTGAACCAACA    |
| mgea5_54a5  | GTCTTAGGGGACATGGCAGA    |
| mgea5_54a3  | CCATTCTGAACCAACACCCT    |
| mgea5_55a5  | TGTTGGTTCAGGCATGTTGT    |
| mgea5_55a3  | AACTGACCTGAGGGCAAATG    |
| mgea5_57a5  | TTTGGGGTACGAGAGCCTAA    |
| mgea5_57a3  | CTTTACCCCTCTCCCCTCAC    |
| mgea5_58a5  | GGACTGATTGGTCCCATTTG    |
| mgea5_58a3  | AAGGCTTTGGTTGGAAGTCA    |
| mgea5_59a5  | GTGAGGGGAGAGGGGTAAAG    |
| mgea5_59a3  | CAAGACCAGGGCATCTGTTT    |
| mgea5_61a5  | GCTGGAACCAAGTTTGCATT    |
| mgea5_61a3  | CCTGCTTGTAGGTGAGGCAT    |
